# Supplementary material
Source: Springer Nature journal article supplement (https://www.springermedizin.de/resource/supplementary/12955_2012_1006_MOESM1_ESM.pdf/9558592)

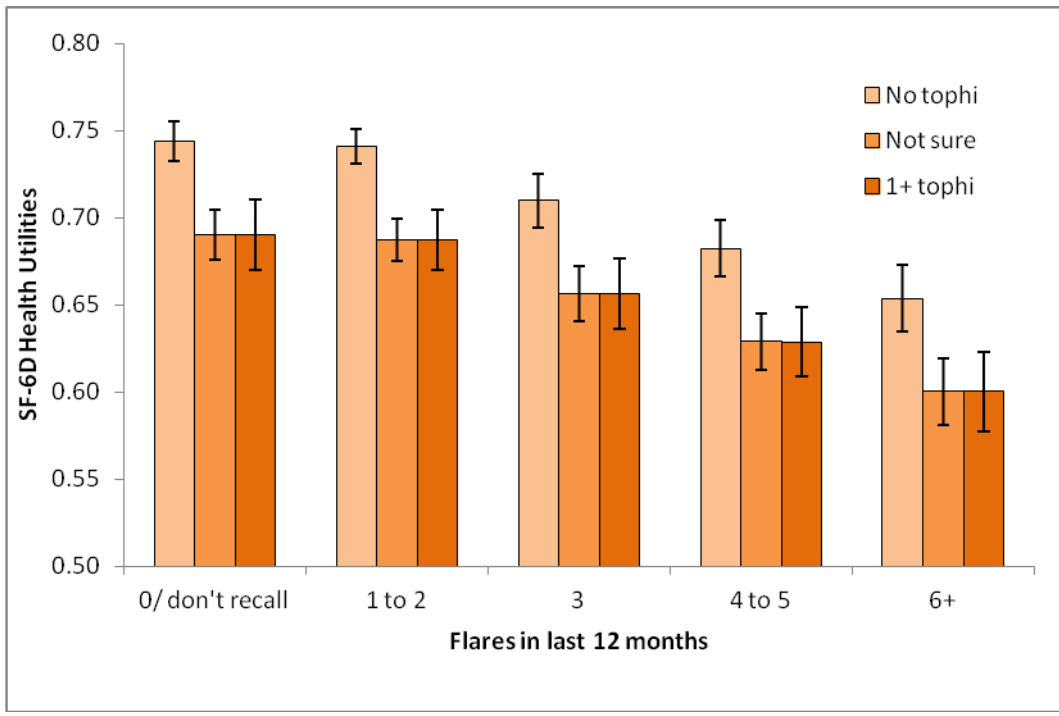

Supplement: MOESM1 [file 9558592]
